# Supplementary material for: BBX11 promotes red light-mediated photomorphogenic development by modulating phyB-PIF4 signaling
Source: PubMed Central journal article supplement (PMC9590482; doi:10.1007/s42994-021-00037-2), 2021-04-26
Supplement: 42994_2021_37_MOESM1_ESM.pdf [file 42994_2021_37_MOESM1_ESM.pdf]

## Supplemental Information

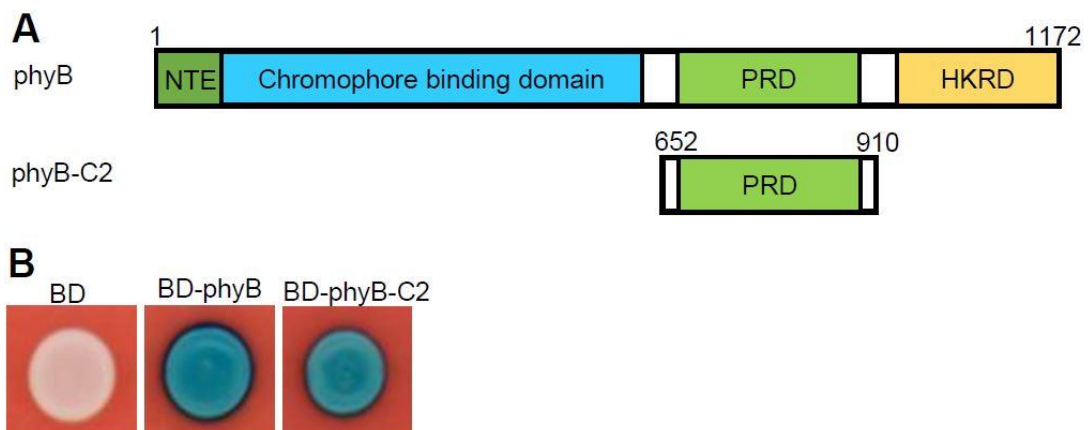

### Supplemental Figure 1. phyB and its PRD domain exhibit self-transactivation activity in yeast cells

- (A) Schematic diagram of phyB and phyB-C2 constructs used in the self-transactivation assays in yeast. Numbers indicate the amino acid positions in phyB.
- (B) BD-phyB and BD-phyB-C2 show self-transactivation activity in yeast cells. The empty vector pLexA-BD served as a negative control.

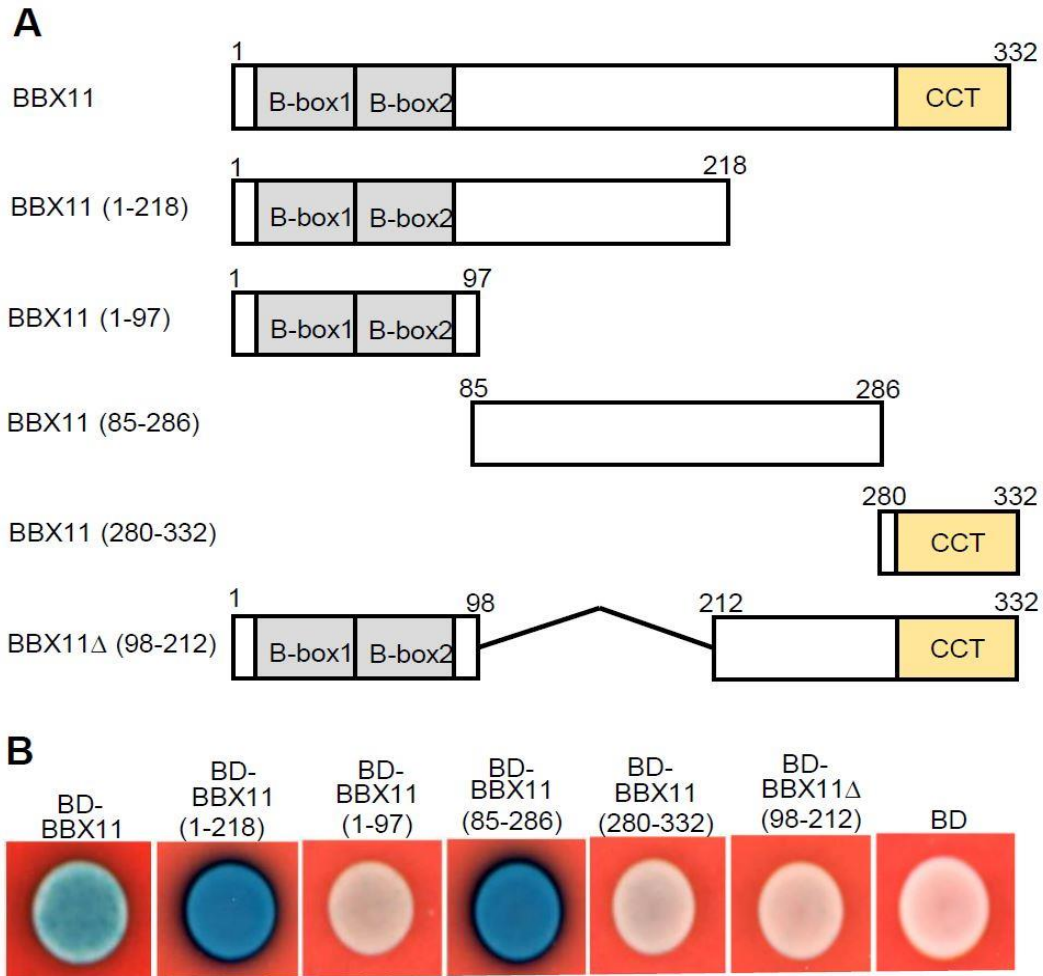

**Supplemental Figure 2. The middle portion of BBX11 is responsible for its self-transactivation activity in yeast cells**

- (A) Schematic diagram of various constructs used in the self-transactivation assays in yeast. Numbers indicate the amino acid positions in BBX11.
- (B) BD-BBX11, BD-BBX11 (1-218) and BD-BBX11 (85-286), but not BD-BBX11 (1-97), BD-BBX11 (280-332), and BD-BBX11 $\Delta$  (98-212) show self-transactivation activity in yeast cells. The empty vector pLexA-BD served as a negative control.

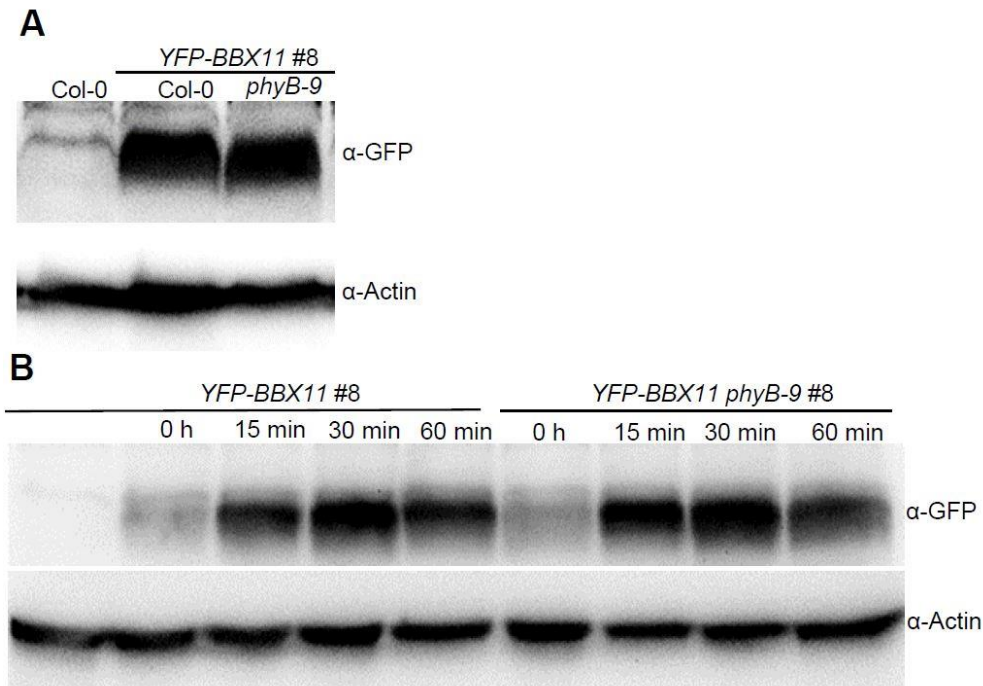

**Supplemental Figure 3. *phyB* may not affect the BBX11 abundance in the red light**

- (A) Immunoblots showing the YFP-BBX11 protein levels in *YFP-BBX11 #8*, and *YFP-BBX11 #8 phyB-9* seedlings grown in the continuous red ( $94 \mu\text{mol}/\text{m}^2/\text{s}$ ) light for 4 d.
- (B) Immunoblots showing the YFP-BBX11 protein levels in 4-d-old dark-grown *YFP-BBX11 #8*, and *YFP-BBX11 #8 phyB-9* seedlings upon transferred to the red ( $94 \mu\text{mol}/\text{m}^2/\text{s}$ ) light for the indicated time periods (0, 15, 30 and 60 min). Col-0 served as a negative control. Anti-Actin was used as a loading control.

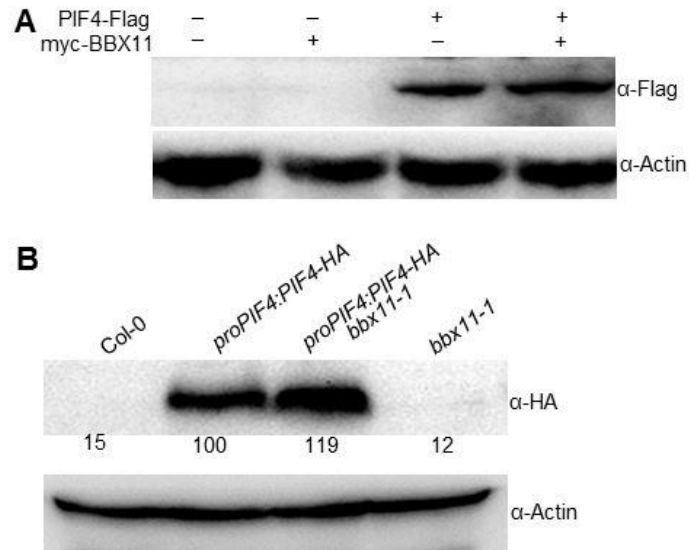

**Supplemental Figure 4. PIF4 protein levels in the *proPIF4:PIF4-HA* and *proPIF4:PIF4-HA bbx11-1* seedlings grown in the red light**

- (A) Immunoblots showing the PIF4-Flag protein levels in *Nicotiana benthamiana* leaves when transiently expressed PIF4-Flag alone or together with myc-BBX11. Anti-Actin was used as a loading control. (Supports Figure 5A-B)
- (B) Immunoblots showing the PIF4-HA protein levels in 4-d-old red light ( $94 \mu\text{mol}/\text{m}^2/\text{s}$ ) grown *proPIF4:PIF4-HA* and *proPIF4:PIF4-HA bbx11-1* seedlings. Col-0 and *bbx11-1* served as a negative control. Anti-Actin was used as a loading control. Numbers below the immunoblots indicate the relative intensities of PIF4 bands normalized to those of Actin, and the ratio was set to 100 for that in Col-0. (Supports Figure 5C)
